# Supplementary material for: GBP1 Facilitates Indoleamine 2,3-Dioxygenase Extracellular Secretion to Promote the Malignant Progression of Lung Cancer
Source: PubMed Central journal article supplement (PMC7857027; doi:10.3389/fimmu.2020.622467), 2021-01-20
Supplement: DataSheet_1.pdf [file DataSheet_1.pdf]

**B**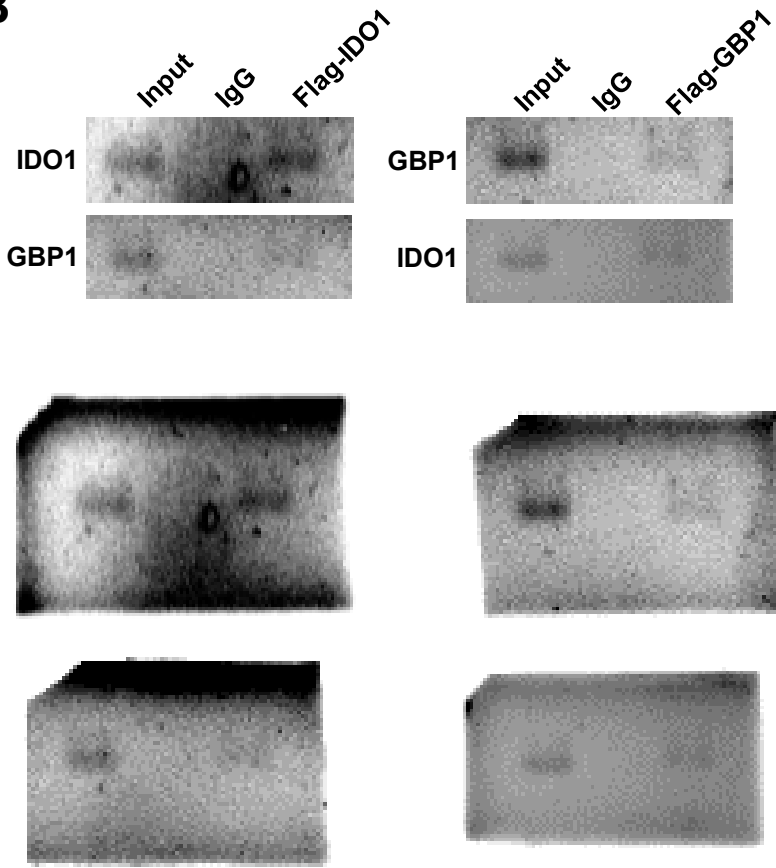**C**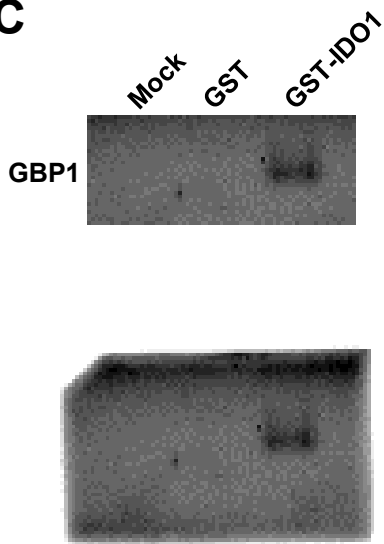**Figure 1**

**A**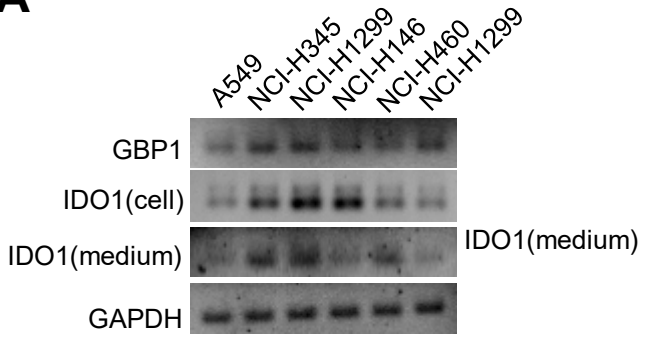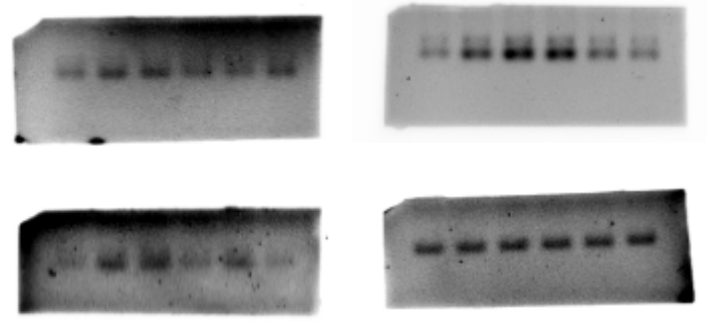**B**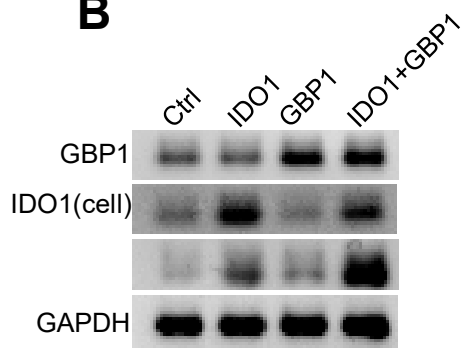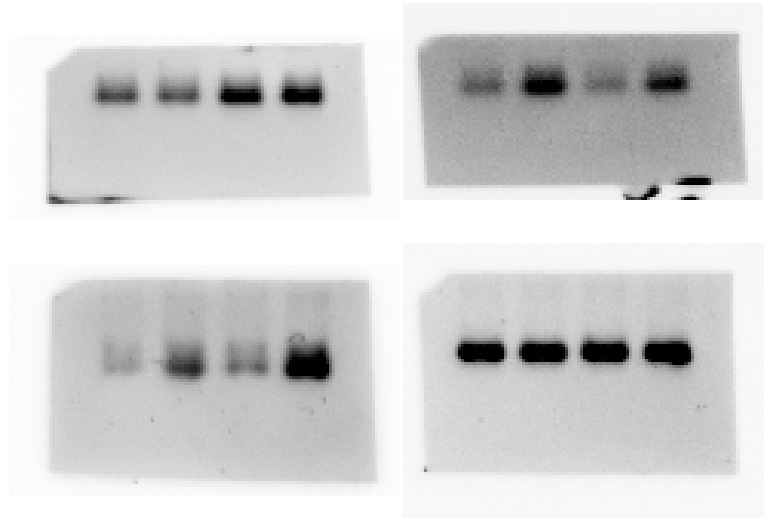**C**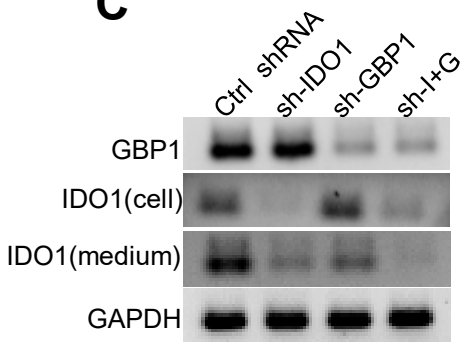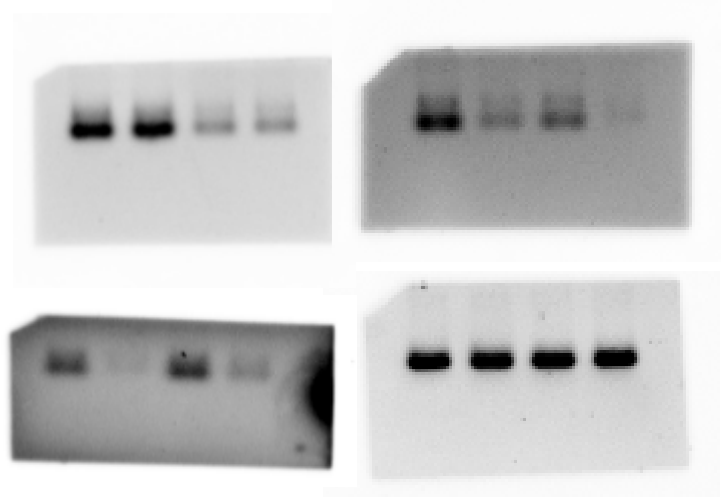**Figure 2**

**B**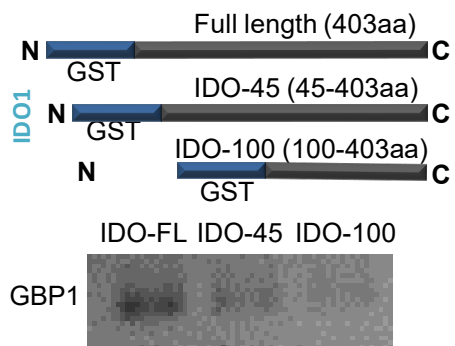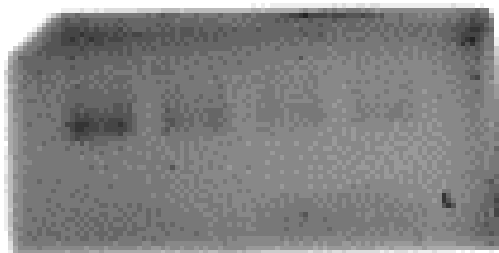**C**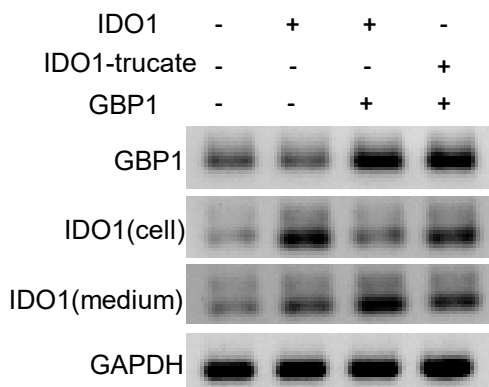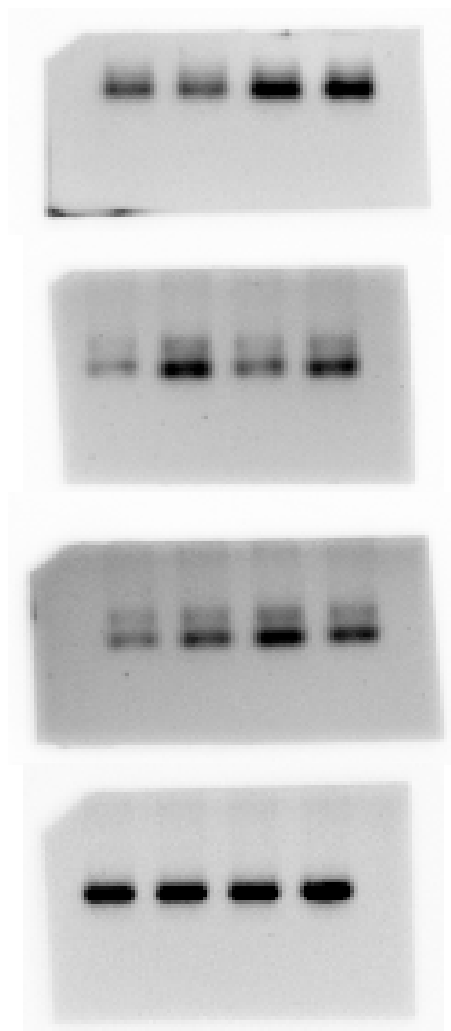**Figure 3**

**B**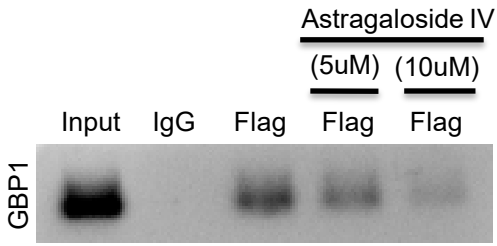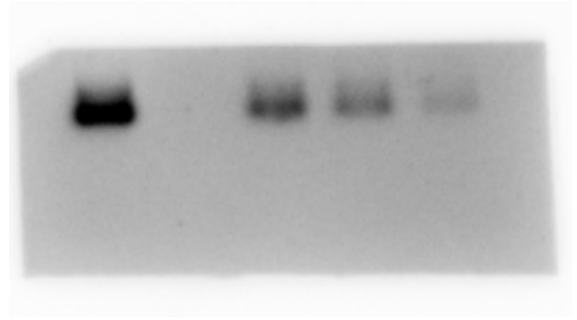**C**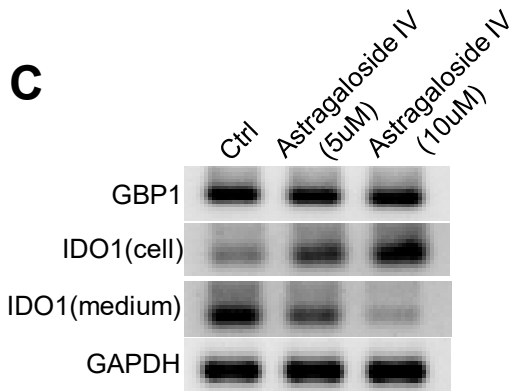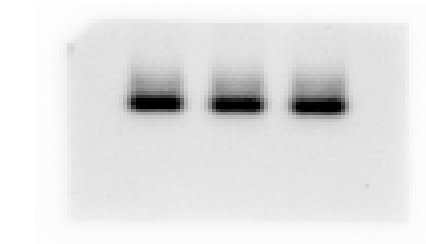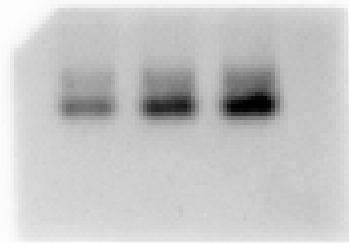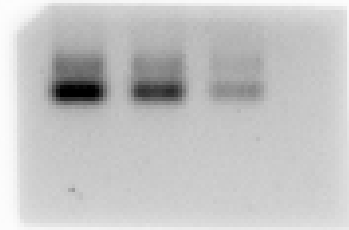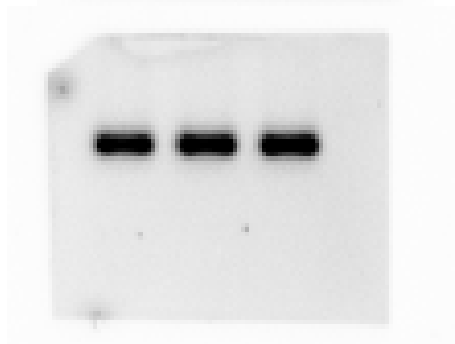**Figure 5**
